# Supplementary material
Source: PubMed Central journal article supplement (PMC4163101)
Supplement: NIHMS618549-supplement-02.pdf [file NIHMS618549-supplement-02.pdf]

Supplemental Table 1 (Relevant to Figure 2):

| CpG number | Context    | chr   | position | Methylation percentages |       |              |
|------------|------------|-------|----------|-------------------------|-------|--------------|
|            |            |       |          | Control                 | WNT3A | WNT3A + FGF2 |
| 1          | CpG        | chr18 | 9068437  | 2.21                    | 1.32  | 4.03         |
| 2          | CpG        | chr18 | 9068467  | 4.48                    | 7.85  | 3.18         |
| 3          | CpG        | chr18 | 9068478  | 4.82                    | 11.66 | 6.62         |
| 4          | CpG        | chr18 | 9068482  | 1.67                    | 1.59  | 1.21         |
| 5          | CpG        | chr18 | 9068501  | 9.94                    | 11.12 | 8.36         |
| 6          | CpG        | chr18 | 9068530  | 14.73                   | 21.09 | 16.17        |
| 7          | CpG        | chr18 | 9068538  | 8.12                    | 12.56 | 9.80         |
|            | <b>ATG</b> | chr18 | 9068541  |                         |       |              |
| 8          | CpG        | chr18 | 9068597  | 3.53                    | 6.17  | 4.57         |
| 9          | CpG        | chr18 | 9068600  | 1.50                    | 1.63  | 2.03         |
| 10         | CpG        | chr18 | 9068620  | 7.50                    | 16.03 | 12.89        |
| 11         | CpG        | chr18 | 9068630  | 15.18                   | 32.58 | 20.05        |
| 12         | CpG        | chr18 | 9068633  | 3.52                    | 3.95  | 5.78         |
| 13         | CpG        | chr18 | 9068651  | 10.83                   | 14.51 | 13.41        |
| 14         | CpG        | chr18 | 9068657  | 17.57                   | 30.71 | 16.51        |
| 15         | CpG        | chr18 | 9068662  | 11.08                   | 25.73 | 13.25        |
| 16         | CpG        | chr18 | 9068668  | 8.27                    | 13.93 | 10.97        |
| 17         | CpG        | chr18 | 9068679  | 8.46                    | 15.67 | 7.30         |
| 18         | CpG        | chr18 | 9068708  | 20.38                   | 29.37 | 20.69        |
| 19         | CpG        | chr18 | 9068713  | 10.04                   | 23.26 | 15.81        |
| 20         | CpG        | chr18 | 9068732  | 29.54                   | 43.92 | 35.26        |
| 21         | CpG        | chr18 | 9068735  | 14.87                   | 31.29 | 19.12        |
| 22         | CpG        | chr18 | 9068750  | 8.28                    | 11.82 | 7.74         |
| 23         | CpG        | chr18 | 9068760  | 18.96                   | 30.95 | 24.41        |
| 24         | CpG        | chr18 | 9068762  | 5.35                    | 8.77  | 6.43         |
| 25         | CpG        | chr18 | 9068768  | 9.15                    | 20.51 | 14.83        |
| 26         | CpG        | chr18 | 9068792  | 9.95                    | 23.28 | 14.12        |
| 27         | CpG        | chr18 | 9068816  | 12.24                   | 20.90 | 15.51        |
| 28         | CpG        | chr18 | 9068820  | 24.49                   | 39.10 | 30.46        |
| 29         | CpG        | chr18 | 9068828  | 30.14                   | 48.52 | 34.79        |
| 30         | CpG        | chr18 | 9068852  | 13.14                   | 25.33 | 16.52        |
| 31         | CpG        | chr18 | 9068859  | 43.82                   | 62.49 | 50.24        |
| 32         | CpG        | chr18 | 9068870  | 20.92                   | 35.32 | 24.15        |
| 33         | CpG        | chr18 | 9068893  | 11.84                   | 23.14 | 18.16        |
| 34         | CpG        | chr18 | 9068898  | 8.08                    | 18.95 | 10.78        |
| 35         | CpG        | chr18 | 9068923  | 17.21                   | 32.99 | 16.20        |
| 36         | CpG        | chr18 | 9068936  | 4.74                    | 8.61  | 4.88         |
| 37         | CpG        | chr18 | 9068939  | 5.92                    | 19.64 | 10.11        |
| 38         | CpG        | chr18 | 9068953  | 6.80                    | 20.89 | 12.68        |
| 39         | CpG        | chr18 | 9068977  | 16.80                   | 45.67 | 28.95        |
| 40         | CpG        | chr18 | 9068990  | 13.14                   | 32.02 | 23.01        |

|    |     |       |         |       |       |       |
|----|-----|-------|---------|-------|-------|-------|
| 41 | CpG | chr18 | 9068995 | 18.95 | 28.97 | 21.90 |
| 42 | CpG | chr18 | 9069007 | 14.27 | 34.79 | 19.49 |
| 43 | CpG | chr18 | 9069015 | 16.81 | 37.60 | 21.58 |
| 44 | CpG | chr18 | 9069036 | 11.92 | 34.07 | 18.55 |
| 45 | CpG | chr18 | 9069045 | 12.74 | 43.93 | 24.56 |
| 46 | CpG | chr18 | 9069048 | 16.66 | 41.39 | 24.46 |
| 47 | CpG | chr18 | 9069050 | 11.70 | 31.35 | 20.09 |
| 48 | CpG | chr18 | 9069105 | 11.25 | 19.94 | 14.34 |
| 49 | CpG | chr18 | 9069121 | 32.94 | 53.42 | 38.83 |
| 50 | CpG | chr18 | 9069137 | 10.01 | 21.60 | 13.05 |
| 51 | CpG | chr18 | 9069140 | 30.90 | 62.31 | 38.53 |

### Supplemental Table 1 Legend.

The percent methylation of CpG residues (determined by bisulfite sequencing) located in the second Sox9 CpG island (CpG2) in genomic DNA isolated from LBMCs that had been cultured for 4 days in either control medium, medium containing soluble Wnt3A, or medium containing both Wnt3A and FGF2 is displayed. The genomic location of either the relevant CpG residue or the ATG translation initiation site of Sox9 are indicated. The relative levels of CpG methylation are indicated by a gradient of colors: dark blue (lowest levels of CpG methylation); light blue; white; pink; dark red (highest levels of CpG methylation). Consistent with our methyl-DNA IP results, we found that Wnt3A administration increased cytosine methylation of CpG residues located throughout the Sox9 CpG2, with the greatest effect occurring in the 3' region of this CpG island. Most notably, concurrent administration of FGF2 (together with Wnt3A) decreased cytosine methylation of CpG residues throughout the Sox9 CpG2.

## Supplemental Experimental Procedures

**ERK2 Kinase assay.** 20 pmol of either GST-hDNMT3A-WT, GST-hDNMT3A-(L373,637A) or GST-hDNMT3A-(S255A) or bacterially produced and purified fragments of mDNMT3A (Jia et al., 2007) were incubated with 50  $\mu$ M ATP, 50  $\mu$ M [ $\gamma$ - $^{32}$ P] ATP (10 Ci/mmol), and 2 U ERK2 (NEB) in kinase buffer at 30°C for 30 min. The reaction was terminated by the addition of Laemmli sample buffer. The phosphorylation of substrate proteins was examined after SDS-PAGE by autoradiography.

**Alcian Blue staining.** The micromass cultures were stained with alcian blue as previously described (Kumar and Lassar, 2009).

**Immunocytochemistry.** Limb buds were isolated from 4 day chicken embryos (H. H. stage 22-24). After overnight fixation in 4% paraformaldehyde at 4°C, they were subjected to a series of sucrose solutions (5% sucrose for 2 hrs, 10% sucrose overnight at 4°C, 20% sucrose for 2hrs at room temperature, 50:50 solution of 20% sucrose and OCT medium for 2 hrs at room temperature) prior to putting them in OCT medium and freezing. For immunofluorescence staining, 10 micron thick sections were permeabilized using 0.25% triton X-100 for 15 minutes followed by blocking in 5% BSA for 1 hr. The sections were incubated with either rabbit anti-phospho-S255 hDNMT3A (1 mg/ml in blocking buffer) or mouse anti-DNMT3A (4 mg/ml in blocking buffer; Abcam ab13888) at 4°C overnight. During incubation with primary antibody, in some cases we added 10 mg/ml of competitor non-phosphorylated or phosphorylated DNMT3A peptide (246a.a.-AVQQPTDPApSPTVATTC-262a.a.). After three washings, the sections were

incubated with secondary antibodies: anti-mouse IgG1 conjugated to Alexa Fluor 594 (Invitrogen) or anti-rabbit IgG conjugated to Alexa Fluor 488 (Invitrogen) for 1 hr. After three washes, the samples were stained with DAPI for 5 minute and then covered with a coverslip using mounting media (Vector Laboratories). Images were obtained using Nikon 80i Upright Microscope with 10x objective.

**Methyl-DNA immunoprecipitation.** For Methyl-DIP analysis we analyzed genomic DNA (approximately 10 micrograms) prepared from a minimum of 20 micromass spots per condition. In most cases, independent Methyl-DIP analyses were performed on 2-3 biological replicates per condition; with three technical repeats of each PCR assay. Significance was calculated using Student's *t*-test. Micromass cultures were washed with PBS and treated with 120 mg/ml trypsin (Sigma) and 120 mg/ml collagenase (Sigma) to prepare a single cell suspension. The cells were harvested after washing with PBS and genomic DNA was isolated using a DNeasy Blood and Tissue kit (Qiagen) and sheared by sonication using Misonix 3000 (12 minutes sonication time; 10s on, 20s off) to obtain approximately 500 bp DNA fragments. Ten microgram of sheared DNA was heated at 95°C for 10 min and snap-chilled before mixing with 10 ml of freshly prepared protein A and protein G Dynal magnetic beads (Invitrogen) that were pre-incubated with 5 mg of either anti-5-methyl-cytidine antibody (ab10805, Abcam), or mouse IgG control antibody (ab18413, Abcam) for a minimum of 4 hr and washed three times with ice-cold PBS plus 5% BSA. The mixture was then incubated overnight in buffer (20 mM Tris-HCl [pH 8.1], 150 mM NaCl, 2 mM EDTA, 1% Triton X-100). The bead-DNA complexes were then washed three times in RIPA buffer (50 mM HEPES

[pH 7.6], 1 mM EDTA, 0.7% Na deoxycholate, 1% NP-40, 0.5 M LiCl) followed by three times with TE buffer (10 mM Tris HCl [pH 8.0], 1 mM EDTA). Immunoprecipitated DNA was then extracted by heating at 65°C in 1% SDS, 0.1 M NaHCO<sub>3</sub> for at least 6 hr. DNA fragments were purified with a QIAquick DNA purification Kit (Qiagen) and analyzed using Sybr-green real time PCR. In all Methyl-DIP analyses, the relative amount of qPCR product generated from immunoprecipitated DNA was normalized to that generated by input DNA. The following primer pairs were used for qPCR: Sox9(CpG1)-FP: 5'-CCTCTCCGCCGCCCTTCTGA-3', Sox9(CpG1)-RP: 5'-CCGGCTGCGAGAGGAGGGAA-3', Sox9(CpG2)-FP: 5'-TTCCCCAAAGGCGACCCGGA-3', and Sox9(CpG2)-FP: 5'-AGGCGTTCATGGGGCGCTTC-3'.

**Chromatin immunoprecipitation.** For ChIP analysis we analyzed pooled chromatin isolated from a minimum of 30 micromass spots per condition. In most cases, independent ChIP analyses were performed on 2-3 biological replicates per condition; with three technical repeats of each PCR assay. Significance was calculated using Student's *t*-test. Micromass cultures were washed with PBS and treated with 120 mg/ml trypsin (Sigma) and 120 mg/ml collagenase (Sigma) to prepare a single cell suspension. The cells were harvested after washing with PBS and cross-linked with 1% formaldehyde 15 minutes at 37°C followed by lysis with 0.35 ml of buffer (50 mM Tris-HCl [pH 8.1], 1% SDS, 10 mM EDTA, 1x protease inhibitor cocktail (Roche). Chromatin was sheared by sonication using Misonix 3000 (12 minutes sonication time; 10s on, 20s off) and supernatants were collected after centrifugation and diluted in buffer (20 mM

Tris-HCl [pH 8.1], 150 mM NaCl, 2 mM EDTA, 1% Triton X-100). Five micrograms of antibody was prebound for a minimum of 4 hr to protein A and protein G Dynal magnetic beads (Invitrogen) and washed three times with ice-cold PBS plus 5% BSA and then added to the diluted chromatin and immunoprecipitated overnight. The bead-chromatin complexes were then washed three times in RIPA buffer (50 mM HEPES [pH 7.6], 1 mM EDTA, 0.7% sodium deoxycholate, 1% NP-40, 0.5 M LiCl) followed by three times with TE buffer (10 mM Tris HCl [pH 8.0], 1 mM EDTA). Immunoprecipitated chromatin was then extracted by heating at 65°C in 1% SDS, 0.1 M NaHCO<sub>3</sub> for at least 6 hr. DNA fragments were purified with a QIAquick DNA purification Kit (Qiagen) and analyzed using Sybr-green real time PCR. In all ChIP analyses, the relative amount of qPCR product generated from immunoprecipitated DNA was normalized to that generated by input DNA. The following antibodies were used for ChIP: Anti-H3K4me3 (ab8580, Abcam), Anti-H3K27me3 (ab6002, Abcam), Anti-H3K9Ac (ab10812, Abcam), Anti-HA (sc-805; Santacruz), Rabbit IgG control (ab46540, Abcam), Mouse IgG control (ab18413, Abcam). The following primer pairs were used for qPCR: Sox9(promoter)-FP: 5'-AACACTGAATTGGGGGATTA-3', and Sox9(promoter)-RP: 5'-GCCCGGAATCGTCTTTTT-3'; Sox9(-350 kb)-FP: 5'-AGCAGAAACAAAGCCCAAGA-3', and Sox9(-350 kb)-RP: 5'-AGTTGCAGGCTAAGCCAAAC-3'; TBP(promoter)-FP: 5'-GCATGTGATGGTGAGCATGCAGGA-3', TBP(promoter)-RP: 5'-TGTGAGGACACTCATACGCACGCA-3'.

**RT-qPCR.** Total RNA was harvested using a RNeasy mini kit (Qiagen). Reverse transcription and qPCR was carried out as previously described (Kumar et al., 2009)

using SYBR Premix Ex Taq kit (Takara). For RT-PCR analysis we analyzed pooled RNA isolated from 3 micromass spots per condition. In most cases, independent RT-qPCR analyses were performed on 2-3 biological replicates per condition; with three technical repeats of each PCR assay. Significance was calculated using Student's *t*-test. In all RT-qPCR analyses, the relative amount of qPCR product generated by various primer sets was normalized to that generated by GAPDH primers. The following primer pairs were used for qPCR: GAPDH-FP: 5'-AGTCATCCCTGAGCTGAATG-3', GAPDH-RP: 5'-AGGATCAAGTCCACAACACG-3', Sox9-FP: 5'-AGGAAGCTGGCTGACCAGTA-3', Sox9-RP: 5'-CGTTCTTCACCGACTTCCTC-3', Collagen II-FP: 5'-ATGCCACCCTCAAATCCCTC-3', Collagen II-RP: 5'-AATCTCCGCTCTTCCACTCG-3', Aggrecan-FP: 5'-CCTGCCTGACCTCTTTGC-3', Aggrecan-RP: 5'-TGGGGAGGAGGGCAACAT-3', Twist2-FP: 5'-TTTCCCCTGTGGATAGCTTG-3', and Twist2-RP: 5'-CATAAGACTGGGAGCTGGGA-3'. FH-DNMT1-FP: 5'-GCTCATGCTTACAACCGGGA-3', FH-DNMT1-RP: 5'-TGATGGTGGTTTGCCTGGTG-3', FH-DNMT3A-FP: 5'-TGTTCCAGATTACGCTGCTCGAGGT-3', FH-DNMT3A-RP: 5'-GCCATGGATGGGGACTTGGAGATCA-3', FH-DNMT3B-FP: 5'-ACACCCAGTCATGCCAAAG-3', and FH-DNMT3B-RP: 5'-GGGACTCGTCCACATGGTTG.

**Bisulfite sequencing.** Micromass cultures were harvested after 4 days of incubation and genomic DNA was prepared using Qiagen DNeasy Blood and Tissue kit. Bisulfite conversion, PCR amplification, DNA sequencing and sequence analysis was carried out

by Active Motif (Carlsbad, CA). Briefly, PCR primers to the target region were designed with the MethPrimer software (<http://www.urogene.org/cgi-bin/methprimer/methprimer.cgi>). All primers were designed to the plus strand. Genomic DNA was bisulfite-converted using MethylDetector (Active Motif). PCR reactions (40 cycles) were performed using Invitrogen's Platinum PCR supermix. For each sample, about equal amounts of the 4 PCR products were pooled and treated with T4 DNA polymerase, Klenow large fragment, and T4 polynucleotide kinase to generate 5'-phosphorylated blunt ends. After concatemerization with T4 DNA ligase the sample was sonicated to an average fragment length of 150-300 bp using a Misonix cuphorn sonicator 3000. Libraries were generated from these sonicated DNA samples using the standard Illumina protocol. The 4 samples were indexed with 6-bp barcodes (independent Illumina index read). Sequencing on Hi-Seq generated 3.5-4.5 million reads per sample. Reads were aligned to the chicken chr18 reference sequence (galGal4 assembly) using the bismark software (version 0.7.7; (Krueger and Andrews, 2011)). Alignment and methylation information was captured in BAM files, and percentage methylation and read coverage at each CpG site was determined by running the appropriate bismark scripts. Alignments to the strands and genomic locations not expected to be present in the PCR products were filtered out using a combination of Samtools (Li et al., 2009) and standard UNIX commands.

**BrdU incorporation.** Twenty four hours before harvesting, micromass cultures were washed with PBS and treated with fresh media containing 10 $\mu$ M BrdU. The cultures



were processed and BrdU incorporation was measured by BrdU labeling and detection kit III (Roche) as per manufacturer's instruction.

## Supplemental References

Jia, D., Jurkowska, R.Z., Zhang, X., Jeltsch, A., and Cheng, X. (2007). Structure of Dnmt3a bound to Dnmt3L suggests a model for de novo DNA methylation. *Nature* 449, 248-251.

Krueger, F., and Andrews, S.R. (2011). Bismark: a flexible aligner and methylation caller for Bisulfite-Seq applications. *Bioinformatics* 27, 1571-1572.

Kumar, D., and Lassar, A.B. (2009). The transcriptional activity of Sox9 in chondrocytes is regulated by RhoA signaling and actin polymerization. *Mol Cell Biol* 29, 4262-4273.

Kumar, D., Shadrach, J.L., Wagers, A.J., and Lassar, A.B. (2009). Id3 is a direct transcriptional target of Pax7 in quiescent satellite cells. *Mol Biol Cell* 20, 3170-3177.

Li, H., Handsaker, B., Wysoker, A., Fennell, T., Ruan, J., Homer, N., Marth, G., Abecasis, G., and Durbin, R. (2009). The Sequence Alignment/Map format and SAMtools. *Bioinformatics* 25, 2078-2079.
